# Supplementary material for: Insight into non-covalent interactions in two triamine-based mononuclear iron(iii) Schiff base complexes with special emphasis on the formation of Br⋯π halogen bonding
Source: Royal Society of Chemistry journal article supplement (doi:10.1039/d0ce01534b), 2021-01-01
Supplement: d0ce01534b1.pdf [file d0ce01534b1.pdf]

(Electronic Supplementary Information)

# An insight to the noncovalent interactions in two triamine based mononuclear iron(III) Schiff base complexes with special emphasis on the formation of Br $\cdots$ $\pi$ halogen bonding

Tanmoy Basak<sup>a</sup>, Antonio Frontera<sup>b,\*</sup> and Shouvik Chattopadhyay<sup>a,\*</sup>

ORTEP diagram

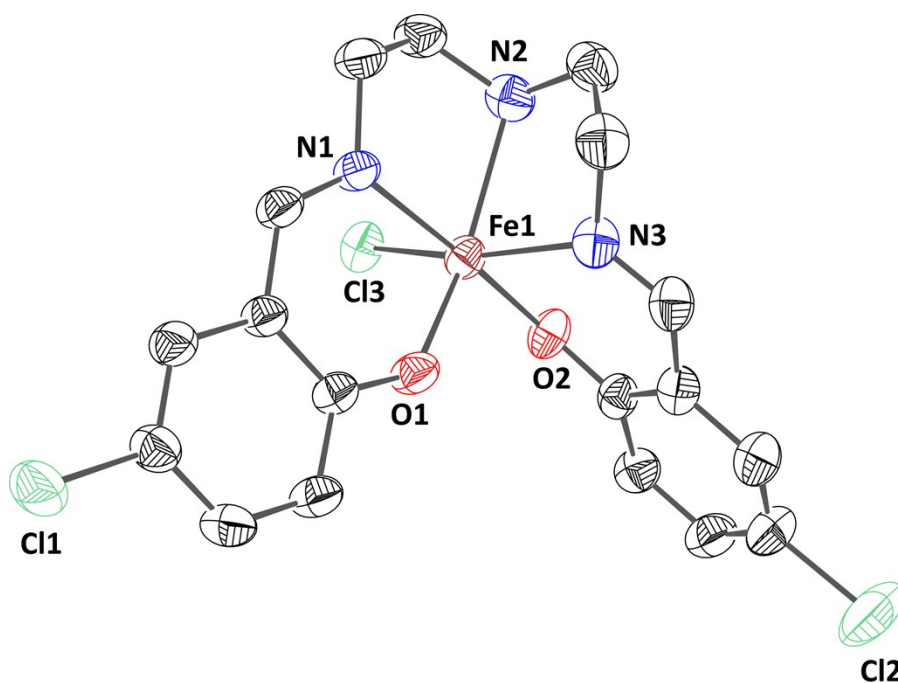

**Fig. S1.** ORTEP view of complex 1 with selective atom numbering scheme.

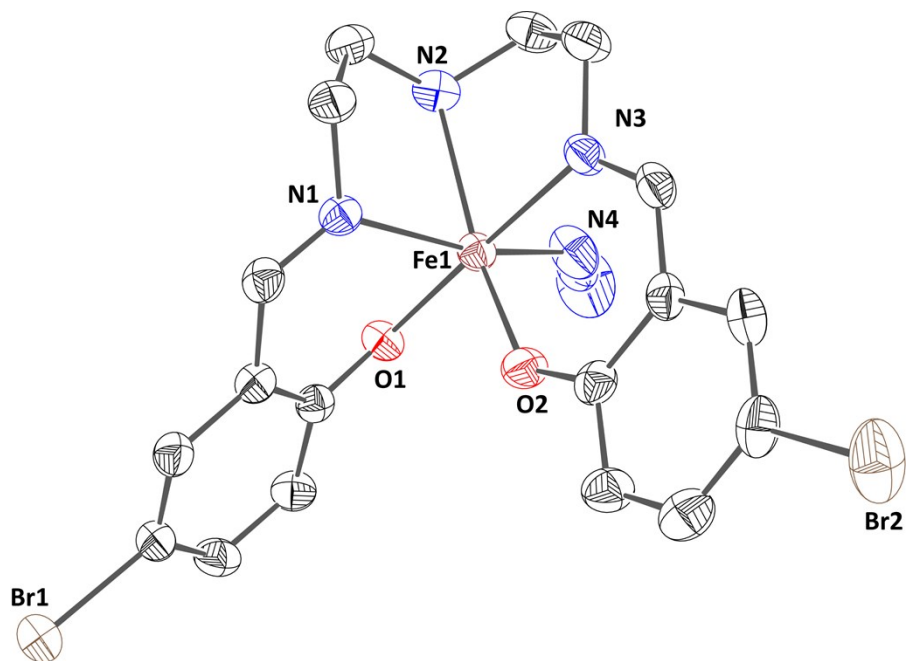

Fig. S2. ORTEP view of complex 2 with selective atom numbering scheme.

### IR Spectra

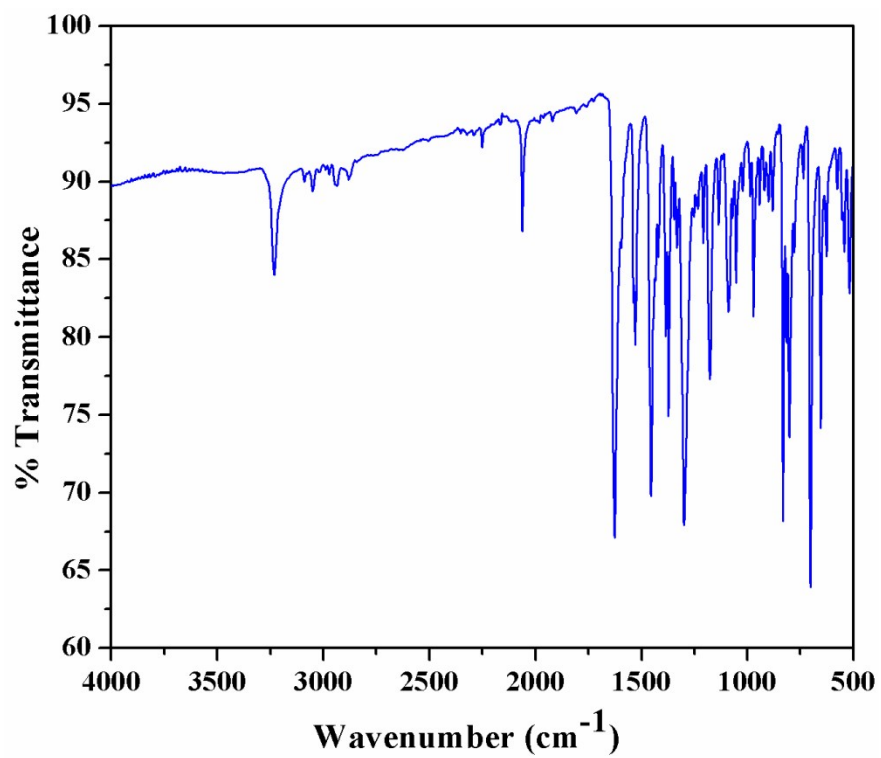

Fig. S3. IR spectrum of complex 1.

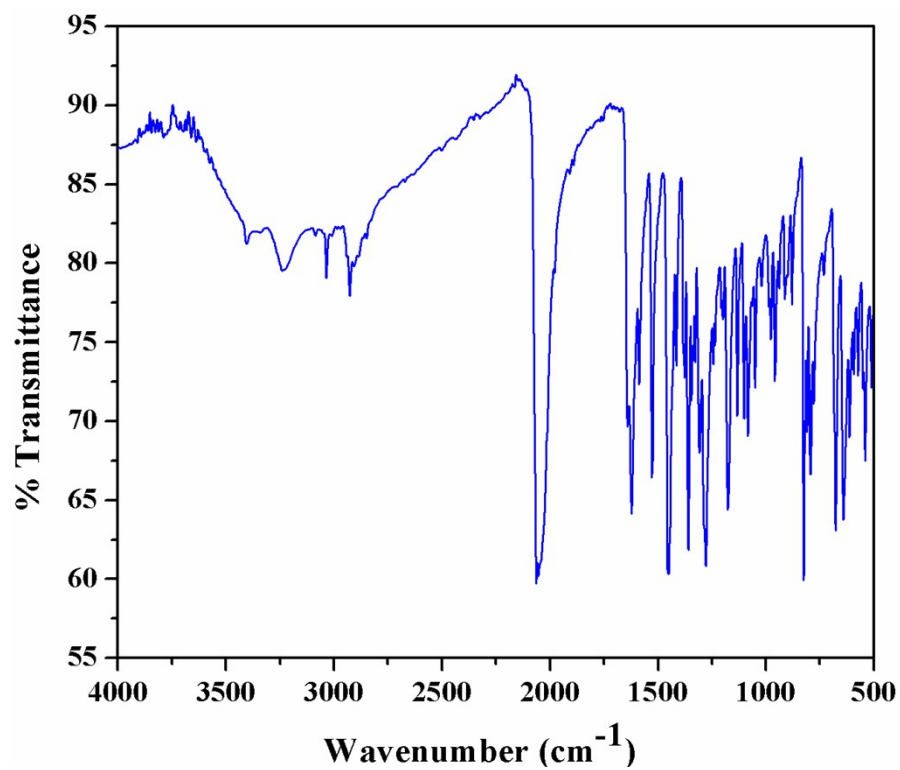

Fig. S4. IR spectrum of complex 2.

### UV-Vis Spectra

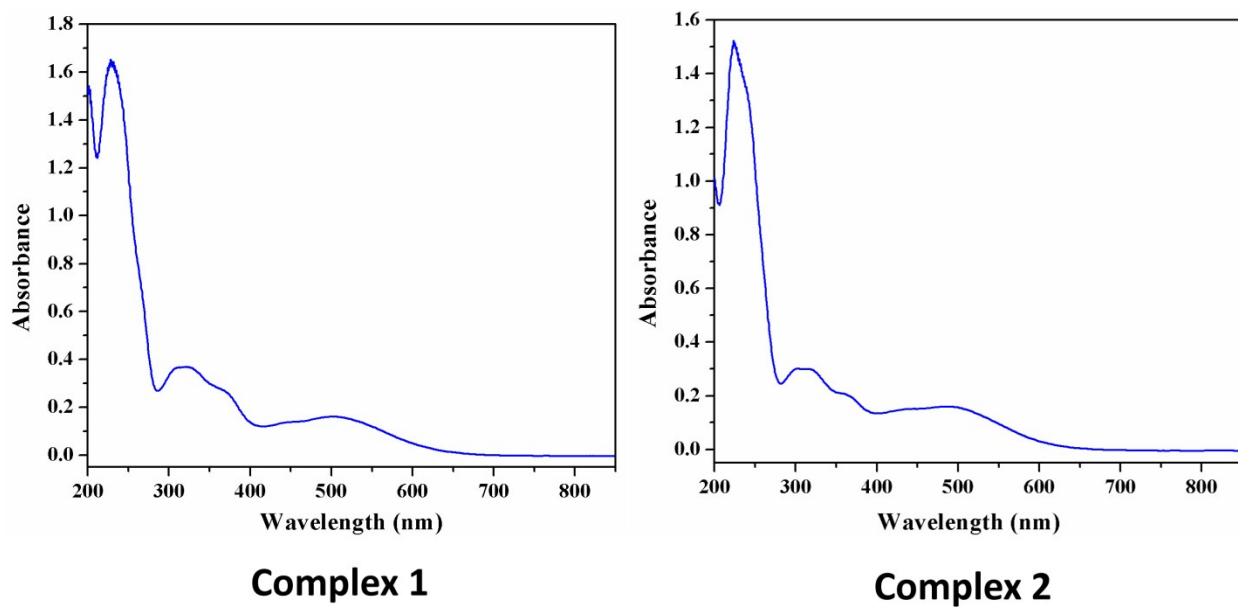

Fig. S5. UV-Vis spectra of both complexes 1 and 2.
